# Supplementary material for: Conditioned Medium from Human Adipose-Derived Mesenchymal Stem Cell Culture Prevents UVB-Induced Skin Aging in Human Keratinocytes and Dermal Fibroblasts
Source: PubMed Central journal article supplement (PMC6981944; doi:10.3390/ijms21010049), 2019-12-19
Supplement: ijms-21-00049-s001.pdf [file ijms-21-00049-s001.pdf]

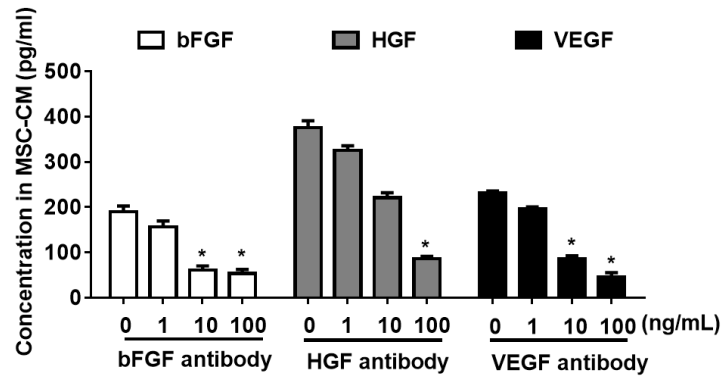

**Figure S1.** Growth factors in conditioned medium. bFGF, HGF and VEGF were determined via an enzyme-linked immunosorbent assay (ELISA) using commercially available ELISA sets. bFGF, fibroblast growth factor; VEGF, vascular endothelial growth factor; HGF, hepatocyte growth factor. \*  $p < 0.05$ , \*  $p < 0.01$  and \*  $p < 0.001$ , compared with control.
